# Supplementary material for: Rational assembly of a biointerfaced core@shell nanocomplex towards selective and highly efficient synergistic photothermal/photodynamic therapy
Source: Royal Society of Chemistry journal article supplement (doi:10.1039/c5nr06501a), 2015-01-01
Supplement: c5nr06501a1.pdf [file c5nr06501a1.pdf]

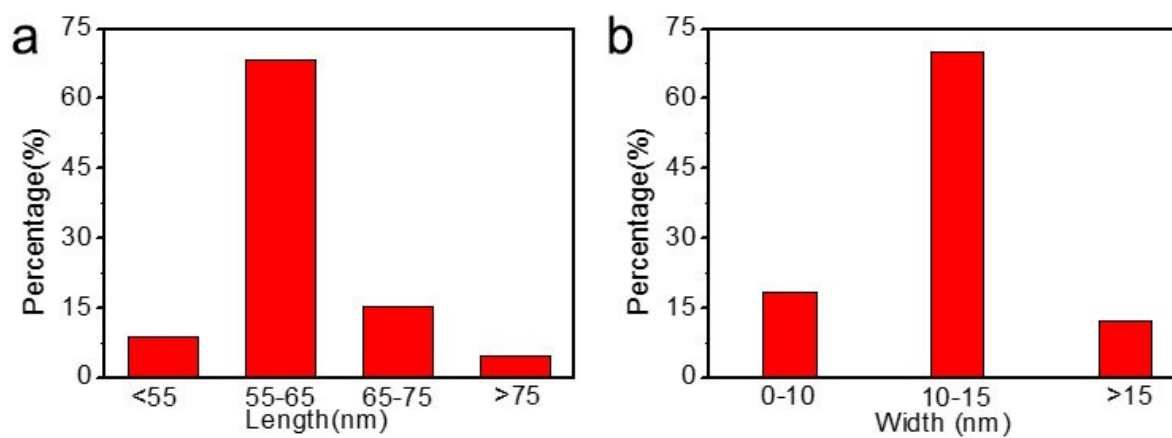

**Fig. S2** Distribution of the length (a) and width (b) of AuNRs as-prepared.

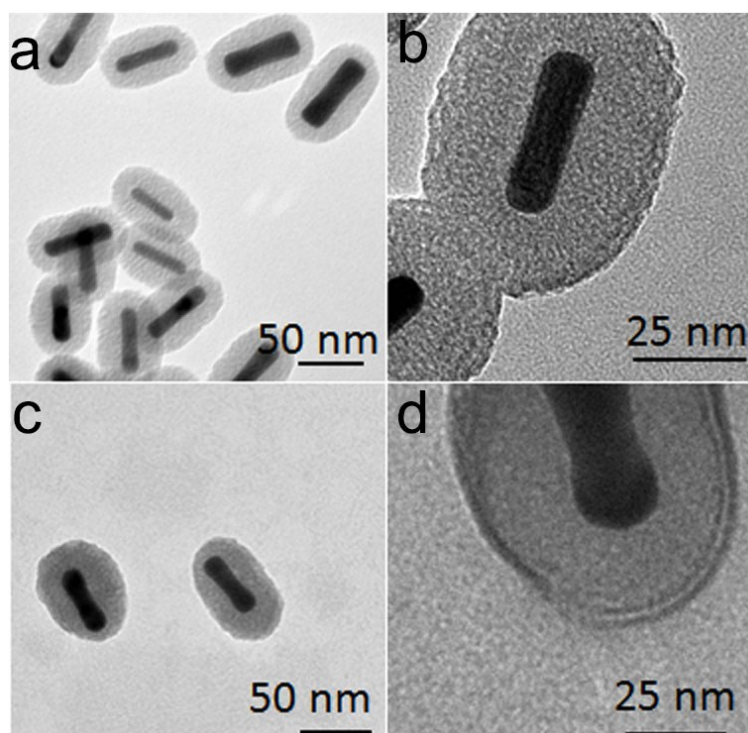

**Fig. S3** TEM images with different magnifications of (a, b) AuNR@MSN, (c, d) AuNR@MSN-HB@LF.

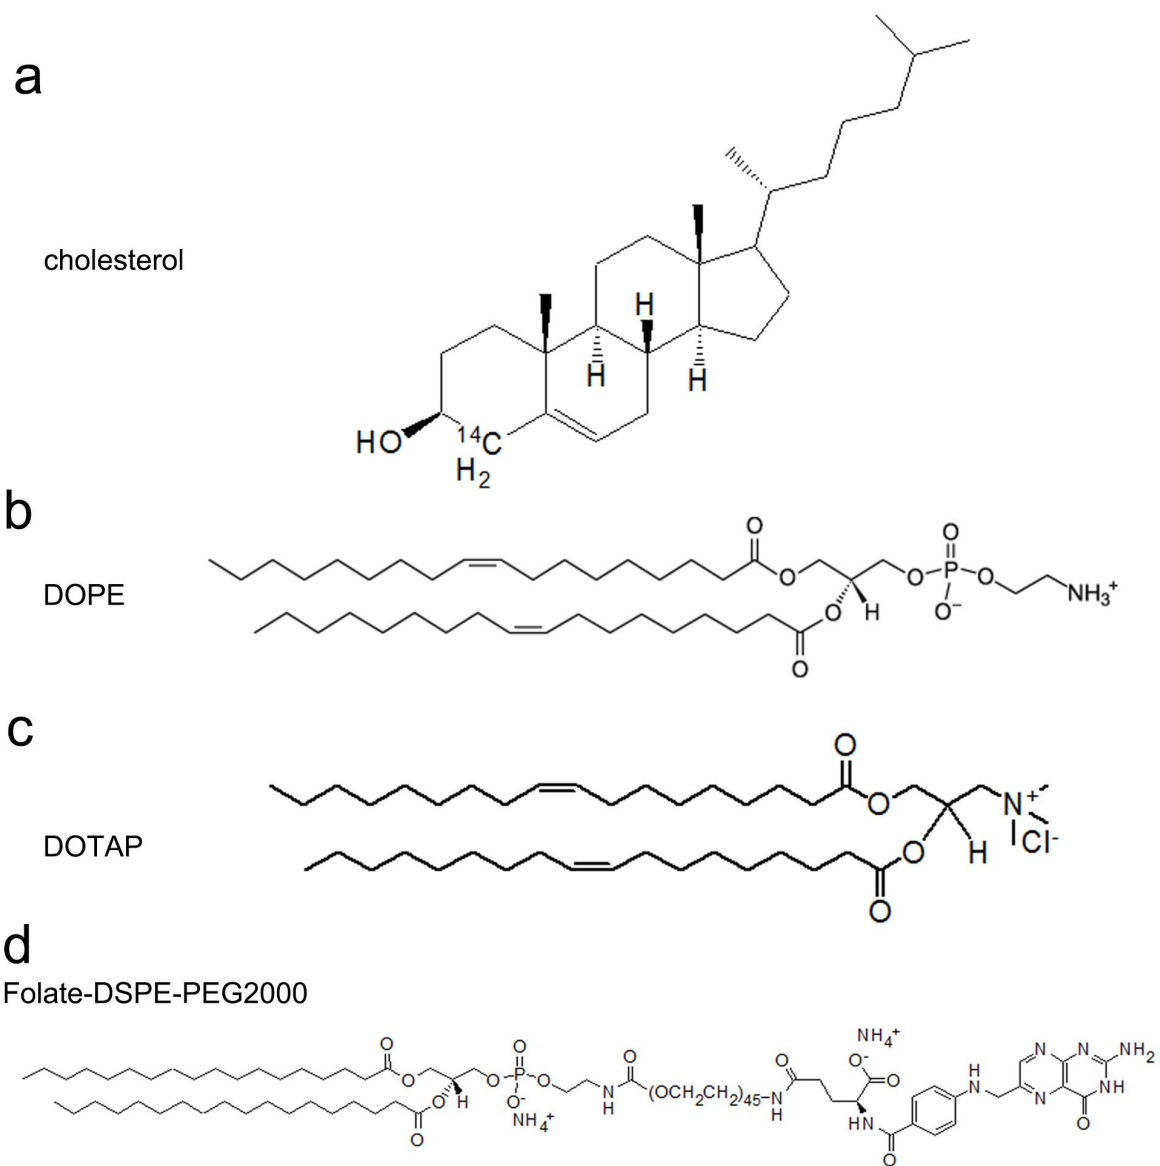

**Fig. S4** Chemical structures of (a) cholesterol, (b) DOPE, (c) DOTAP, (d) DSPE-PEG2000-Folate.

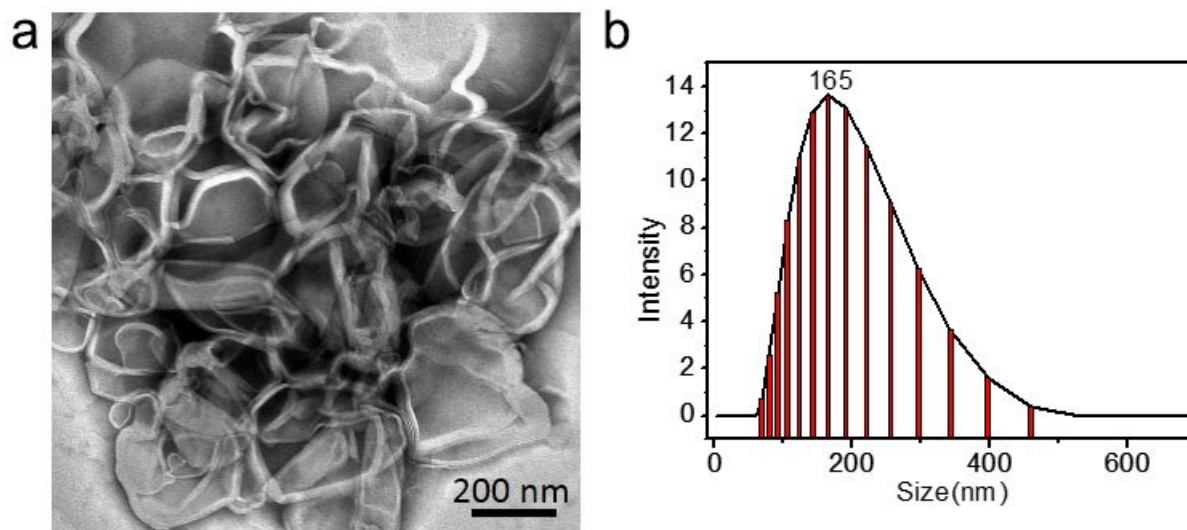

Fig. S5 (a) TEM image of the mixed liposome; (b) relevant DLS measurement.

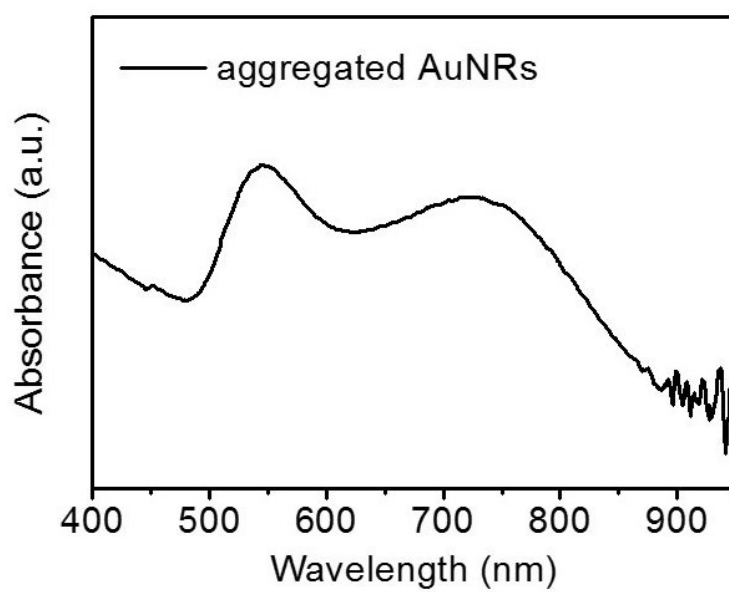

Fig. S6 UV-vis spectrum of aggregated AuNRs without surface modification.

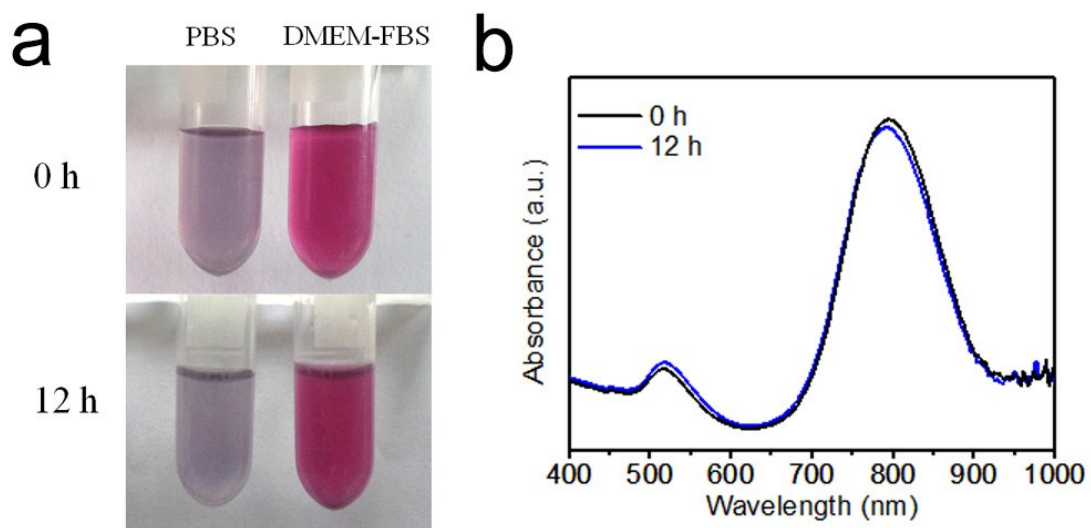

**Fig. S7** (a) Photoimages of AuNR@MSN-HB@LF incubated in buffer solution and serum containing medium. (b) Corresponding UV-vis spectra of AuNR@MSN-HB@LF.

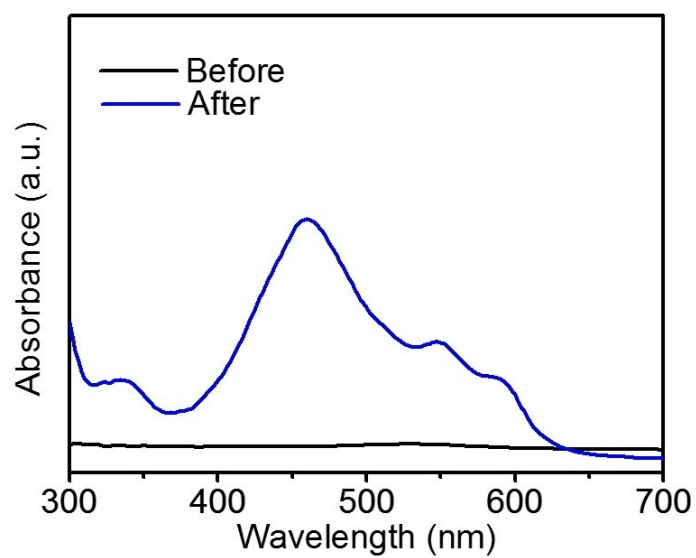

**Fig. S8** UV-vis spectra of the supernatant before and after irradiating AuNR@MSN-HB@LF solution.

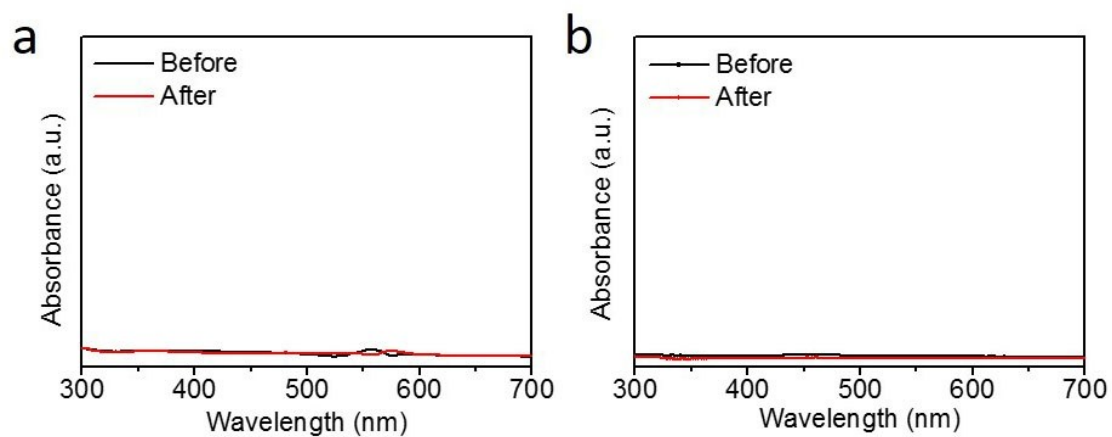

**Fig. S9** UV-vis spectra of the supernatant of AuNR@MSN-HB solution before and after lipid coating without irradiation in (a) cell culture medium and (b) PBS (pH 7.2).

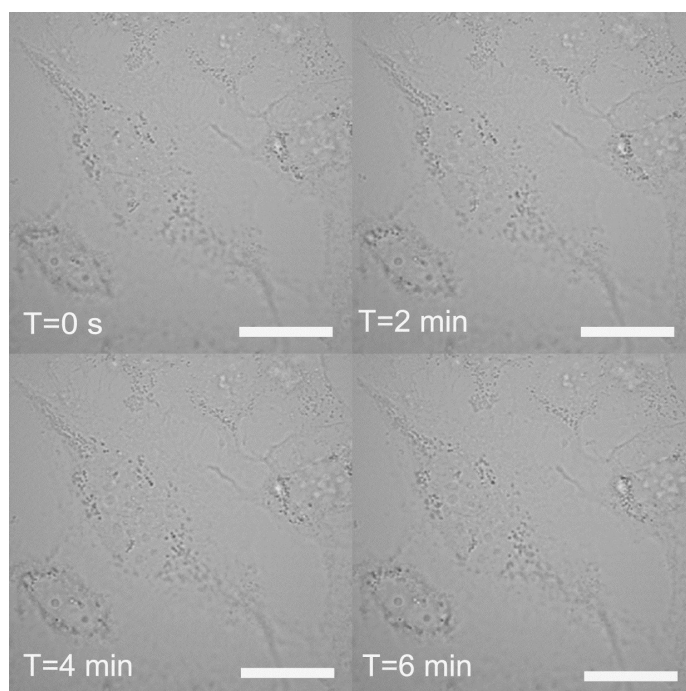

**Fig. S10** Time-dependent CLSM images of MCF-7 cells without the bioconjugate under the same irradiation condition. The scale bars are 30  $\mu\text{m}$ .

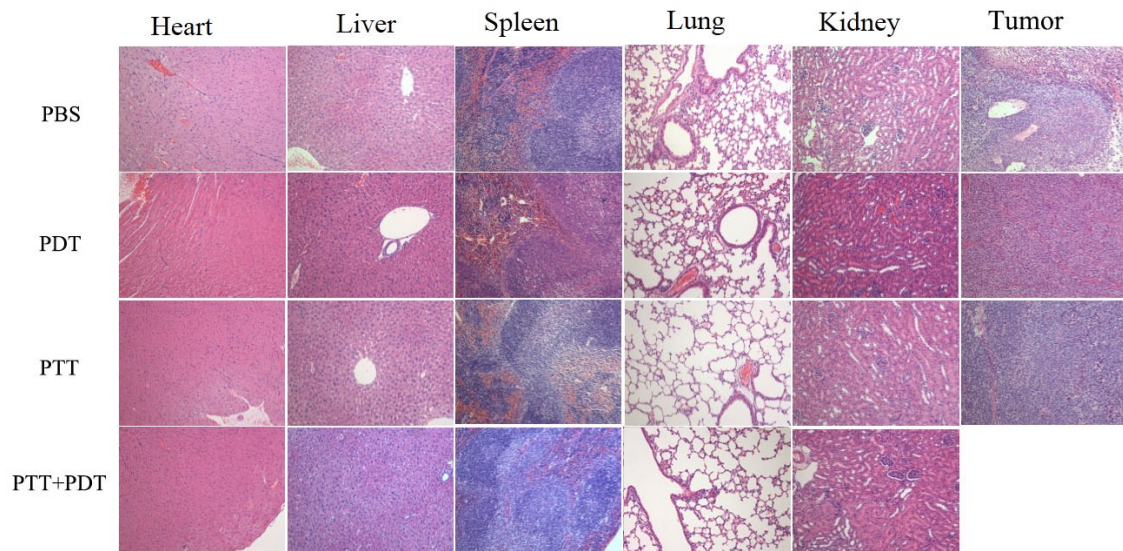

**Fig. S11** The 19-day HE section of main organs and tumor after treatment.
